# Supplementary material
Source: MDPI journal article supplement (https://www.mdpi.com/2071-1050/15/15/11526)
Supplement: s1 [file s1]

## Supplementary material:

# Analysis of Chemical and Phytotoxic Properties of Frass Derived from Black Soldier Fly-Based Bioconversion of Biosolids

Kristin Bohm <sup>1,\*</sup>, Gregory A. Hatley <sup>2</sup>, Brett H. Robinson <sup>2</sup> and María J. Gutiérrez-Ginés <sup>3</sup>

**Table S1.** Kruskal-Wallis test results to compare differences between the type of feedstock processed by BSFL per chemical parameter as well as its origin (feedstock or frass). Significance codes: < 0.001 '\*\*\*'; < 0.01 '\*\*'; < 0.05 '\*'.

| Origin    | Parameter                               | n  | statistic | df | p         |
|-----------|-----------------------------------------|----|-----------|----|-----------|
| Feedstock | Total C (%)                             | 15 | 12.3      | 4  | 0.0156*   |
| Feedstock | Total N (%)                             | 15 | 13.5      | 4  | 0.00907** |
| Feedstock | C/N ratio                               | 15 | 13        | 4  | 0.0111*   |
| Feedstock | Total P (g/kg)                          | 15 | 13        | 4  | 0.0111*   |
| Feedstock | NO <sub>3</sub> <sup>-</sup> -N (mg/kg) | 15 | 11.6      | 4  | 0.0207*   |
| Feedstock | NH <sub>4</sub> <sup>+</sup> -N (mg/kg) | 15 | 12.4      | 4  | 0.0147*   |
| Feedstock | Organic matter (g/kg)                   | 15 | 12.9      | 4  | 0.0115*   |
| Feedstock | EC (mS/cm)                              | 15 | 13.2      | 4  | 0.0102*   |
| Feedstock | pH                                      | 15 | 13.2      | 4  | 0.0105*   |
| Frass     | Total C (%)                             | 15 | 11.2      | 4  | 0.0241*   |
| Frass     | Total N (%)                             | 15 | 13.5      | 4  | 0.00907** |
| Frass     | C/N ratio                               | 15 | 13.5      | 4  | 0.00907** |
| Frass     | Total P (g/kg)                          | 15 | 12.8      | 4  | 0.0121*   |
| Frass     | NO <sub>3</sub> <sup>-</sup> -N (mg/kg) | 15 | 5.6       | 4  | 0.231     |
| Frass     | NH <sub>4</sub> <sup>+</sup> -N (mg/kg) | 15 | 13.5      | 4  | 0.00907** |
| Frass     | Organic matter (g/kg)                   | 15 | 12.7      | 4  | 0.013*    |
| Frass     | EC (mS/cm)                              | 15 | 12.9      | 4  | 0.012*    |
| Frass     | pH                                      | 15 | 6.73      | 4  | 0.151     |

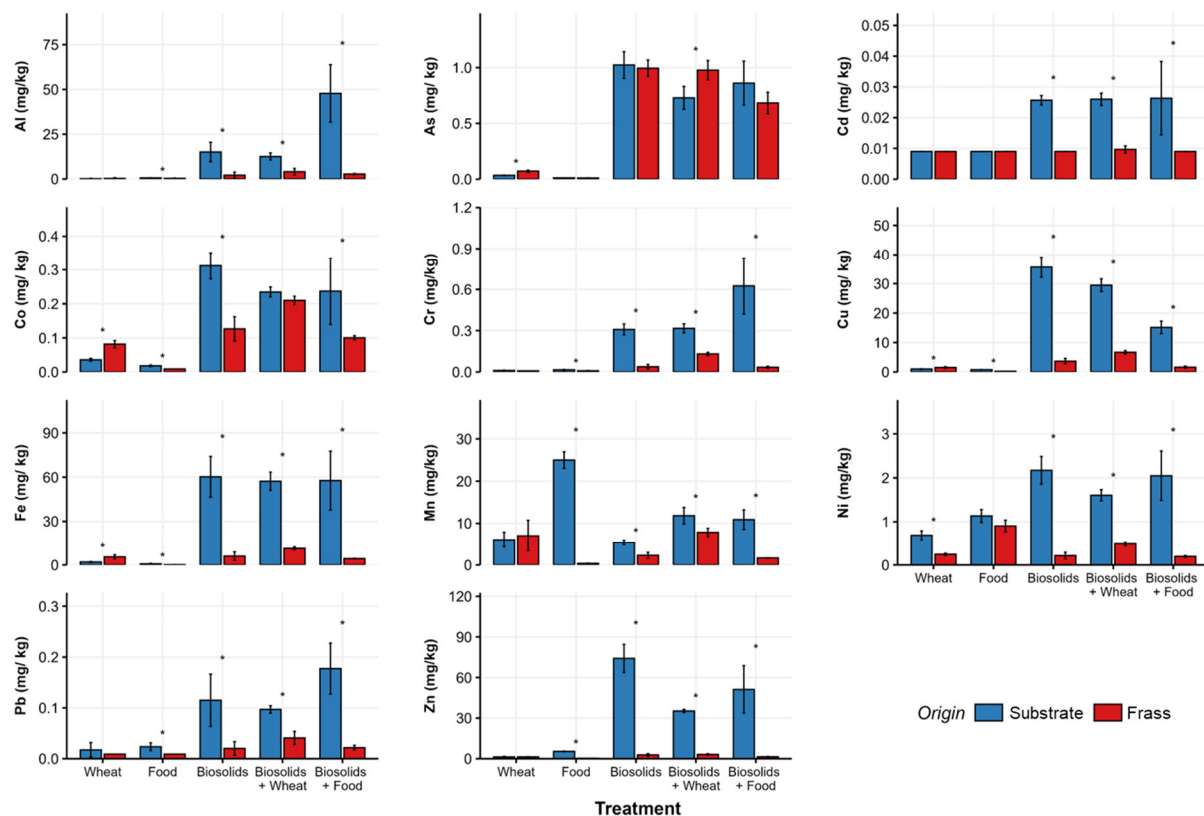

**Figure S1.** Concentrations of bioavailable fraction of trace elements in BSFL feedstock (blue) and frass (red). Asterisks indicate significant differences between feedstock and frass per treatment ( $p < 0.05$ ). Missing asterisks indicate non-significance.

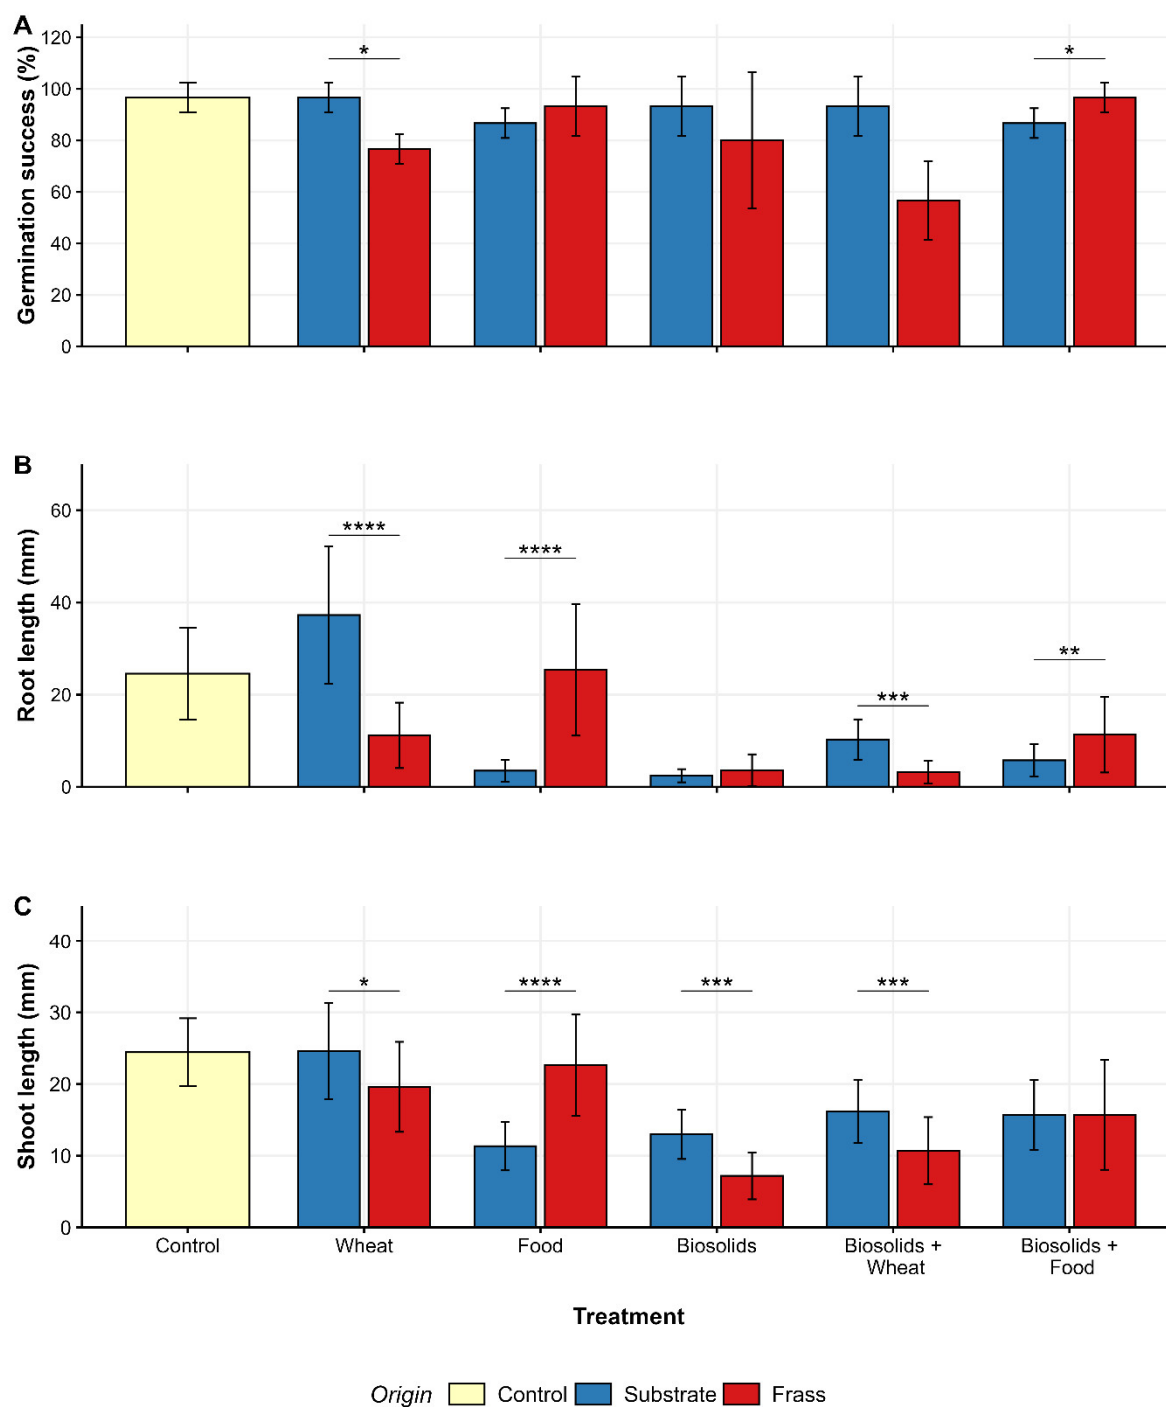

**Figure S2.** Germination success (A), root (B) and shoot length (C) of lettuce. Seeds were incubated on filter paper with water (control) or extracts of feedstocks and frass of BSFL feeding experiments of different treatments: Wheat bran (Wheat), Food waste (Food), dewatered sludge (Biosolids), dewatered sludge blended with Food waste in ratio 50:50 (Biosolids + Food), dewatered sludge blended with Wheat bran in the ratio 50:50 (Biosolids + Wheat). Asterisks represent significant differences of the respective parameter among feedstock and frass per treatment (Significance codes: < 0.001 '\*\*\*'; < 0.01 '\*\*'; < 0.05 '\*'). Missing asterisks indicate non-significance (ns). Mean values with standard deviations are displayed (n = 30 [3 x 10 seeds]).

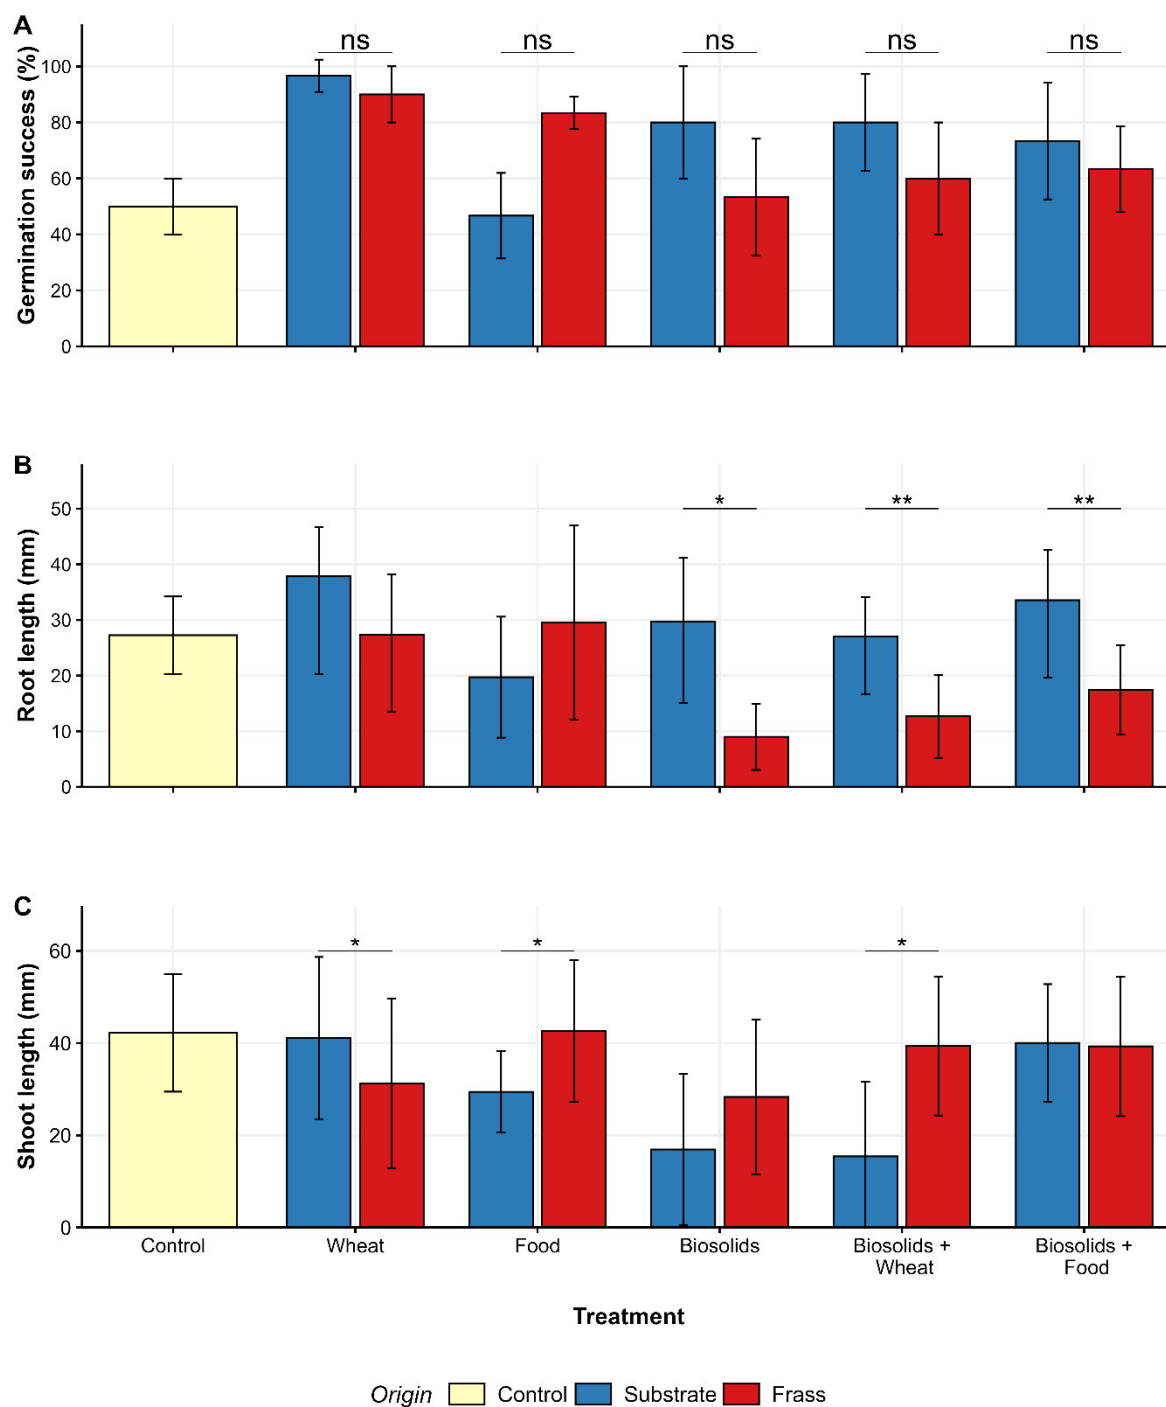

**Figure S3.** Germination success (A), root (B) and shoot length (C) of radish grown on water (control) or extracts of feedstocks or frass of BSFL feeding experiments of different treatments: Wheat bran (Wheat), Food waste (Food), dewatered sludge (Biosolids), dewatered sludge blended with Food waste in ratio 50:50 (Biosolids + Food), dewatered sludge blended with Wheat bran in the ratio 50:50 (Biosolids + Wheat). Asterisks represent significant differences of the respective parameter among feedstock and frass per treatment (Significance codes: < 0.001 '\*\*\*'; < 0.01 '\*\*'; < 0.05 '\*'). Missing asterisks indicate non-significance (ns). Mean values with standard deviations are displayed (n = 30 [3 x 10 seeds]).

**Table S2.** T-test results for differences of germination success (n = 3), seedling root or shoot length (n = 30) for extracts obtained from BSFL feedstock or frass compared to the control (water). Plant species tested was lettuce.

| Variable tested     | Group 1 | Group 2           | Origin    | Statistic | df    | P value <sup>1</sup> |
|---------------------|---------|-------------------|-----------|-----------|-------|----------------------|
| Germination success | Control | Wheat             | Feedstock | 0.00      | 4.00  | 1.00                 |
| Germination success | Control | Food              | Feedstock | 2.23      | 2.75  | 0.60                 |
| Germination success | Control | Biosolids         | Feedstock | 0.25      | 3.56  | 1.00                 |
| Germination success | Control | Biosolids + Wheat | Feedstock | 0.25      | 3.56  | 1.00                 |
| Germination success | Control | Biosolids + Food  | Feedstock | 2.23      | 2.75  | 0.60                 |
| Root length         | Control | Wheat             | Feedstock | 11.80     | 29.20 | 6.15E-12****         |
| Root length         | Control | Food              | Feedstock | 9.49      | 35.60 | 1.39E-10****         |
| Root length         | Control | Biosolids         | Feedstock | 7.03      | 38.60 | 1.03E-07****         |
| Root length         | Control | Biosolids + Wheat | Feedstock | 11.00     | 31.50 | 1.24E-11****         |
| Root length         | Control | Biosolids + Food  | Feedstock | -3.82     | 48.90 | 0.002**              |
| Shoot length        | Control | Wheat             | Feedstock | 10.40     | 51.20 | 1.36E-13****         |
| Shoot length        | Control | Food              | Feedstock | 6.71      | 51.90 | 7.10E-08****         |
| Shoot length        | Control | Biosolids         | Feedstock | 6.79      | 54.90 | 4.13E-08****         |
| Shoot length        | Control | Biosolids + Wheat | Feedstock | 11.90     | 50.60 | 1.47E-15****         |
| Shoot length        | Control | Biosolids + Food  | Feedstock | -0.09     | 50.30 | 0.93                 |
| Germination success | Control | Wheat             | Frass     | 3.47      | 2.51  | 0.053                |
| Germination success | Control | Food              | Frass     | 0.25      | 3.56  | 0.82                 |
| Germination success | Control | Biosolids         | Frass     | 1.04      | 2.84  | 0.38                 |
| Germination success | Control | Biosolids + Wheat | Frass     | 4.36      | 3.88  | 0.013**              |
| Germination success | Control | Biosolids + Food  | Frass     | 0.00      | 4.00  | 1.00                 |
| Root length         | Control | Wheat             | Frass     | 15.60     | 49.60 | 4.83E-20****         |
| Root length         | Control | Food              | Frass     | 5.21      | 46.70 | 2.08E-05****         |
| Root length         | Control | Biosolids         | Frass     | 9.56      | 34.00 | 1.86E-10****         |
| Root length         | Control | Biosolids + Wheat | Frass     | 1.13      | 47.10 | 1.00                 |
| Root length         | Control | Biosolids + Food  | Frass     | 3.07      | 40.00 | 0.019*               |
| Shoot length        | Control | Wheat             | Frass     | 15.60     | 49.60 | 4.83E-20****         |
| Shoot length        | Control | Food              | Frass     | 5.21      | 46.70 | 2.08E-05****         |
| Shoot length        | Control | Biosolids         | Frass     | 9.56      | 34.00 | 1.86E-10****         |
| Shoot length        | Control | Biosolids + Wheat | Frass     | 1.13      | 47.10 | 1.00                 |
| Shoot length        | Control | Biosolids + Food  | Frass     | 3.07      | 40.00 | 0.019*               |

<sup>1</sup>Significance codes: < 0.0001 '\*\*\*\*'; < 0.001 '\*\*\*'; < 0.01 '\*\*'; < 0.05 '\*'

**Table S3.** T-test results for differences of germination success (n = 3), seedling root or shoot length (n = 30) for extracts obtained from BSFL feedstock or frass compared to the control (water). Plant species tested was radish.

| Variable tested     | Group 1 | Group 2           | Origin    | Statistic | df   | P value <sup>1</sup> |
|---------------------|---------|-------------------|-----------|-----------|------|----------------------|
| Germination success | Control | Wheat             | Feedstock | -5.56     | 3.08 | 0.011*               |
| Germination success | Control | Food              | Feedstock | 0.53      | 2.8  | 0.64                 |
| Germination success | Control | Biosolids         | Feedstock | -1.92     | 2.33 | 0.18                 |
| Germination success | Control | Biosolids + Wheat | Feedstock | -2.55     | 2.88 | 0.087                |
| Germination success | Control | Biosolids + Food  | Feedstock | -1.76     | 2.7  | 0.19                 |
| Root length         | Control | Wheat             | Feedstock | -2.97     | 40.8 | 0.025*               |
| Root length         | Control | Food              | Feedstock | 2.21      | 21.9 | 0.188                |
| Root length         | Control | Biosolids         | Feedstock | -0.68     | 34.9 | 1                    |
| Root length         | Control | Biosolids + Wheat | Feedstock | 0.06      | 36.8 | 1                    |
| Root length         | Control | Biosolids + Food  | Feedstock | -1.57     | 24.7 | 0.65                 |
| Shoot length        | Control | Wheat             | Feedstock | 0.04      | 36.1 | 1                    |
| Shoot length        | Control | Food              | Feedstock | 4.29      | 22.8 | 0.001**              |
| Shoot length        | Control | Biosolids         | Feedstock | 6.87      | 28.4 | 8.50E-07****         |
| Shoot length        | Control | Biosolids + Wheat | Feedstock | 5.85      | 35.6 | 5.75E-06****         |
| Shoot length        | Control | Biosolids + Food  | Feedstock | 1.15      | 34.5 | 1                    |
| Germination success | Control | Wheat             | Frass     | -3.51     | 2.7  | 0.046*               |
| Germination success | Control | Food              | Frass     | -4.92     | 3.84 | 0.009**              |
| Germination success | Control | Biosolids         | Frass     | -0.25     | 2.85 | 0.82                 |
| Germination success | Control | Biosolids + Wheat | Frass     | -0.79     | 2.86 | 0.49                 |
| Germination success | Control | Biosolids + Food  | Frass     | -0.79     | 2.86 | 0.49                 |
| Root length         | Control | Wheat             | Frass     | -0.02     | 39.5 | 1                    |
| Root length         | Control | Food              | Frass     | -0.57     | 34.2 | 1                    |
| Root length         | Control | Biosolids         | Frass     | 7.84      | 27.7 | 8.35E-08****         |
| Root length         | Control | Biosolids + Wheat | Frass     | 5.82      | 30.6 | 1.08E-05****         |
| Root length         | Control | Biosolids + Food  | Frass     | 4.02      | 33   | 0.002**              |
| Shoot length        | Control | Wheat             | Frass     | 2.16      | 38.7 | 0.19                 |
| Shoot length        | Control | Food              | Frass     | -0.1      | 34   | 1                    |
| Shoot length        | Control | Biosolids         | Frass     | 1.67      | 26.7 | 0.54                 |
| Shoot length        | Control | Biosolids + Wheat | Frass     | 0.08      | 30.4 | 1                    |
| Shoot length        | Control | Biosolids + Food  | Frass     | 0.48      | 29.9 | 1                    |

<sup>1</sup>Significance codes: < 0.0001 '\*\*\*\*'; < 0.001 '\*\*\*'; < 0.01 '\*\*'; < 0.05 '\*'

**Table S4.** Spearman's rank correlation results for germination parameters in relation to chemical composition of BSFL feedstocks and frass. Plant species tested was lettuce.

| Parameter             | RSG     | RGG      | GI       |
|-----------------------|---------|----------|----------|
| Total carbon          | 0.30    | -0.05    | 0.03     |
| Total nitrogen        | 0.20    | -0.38**  | -0.32    |
| C/N ratio             | -0.21   | 0.37*    | 0.33     |
| NO3-N                 | -0.13   | -0.58**  | -0.48**  |
| NH4-N                 | -0.31   | -0.49**  | -0.54**  |
| Total recoverable P   | -0.32   | -0.16    | -0.24    |
| Organic matter        | 0.03    | 0.19     | 0.19     |
| pH                    | -0.21   | 0.15     | 0.06     |
| EC                    | -0.53** | -0.63*** | -0.69*** |
| Sum of macro elements | -0.02   | 0.13     | 0.14     |
| Ca                    | 0.25    | -0.07    | 0.01     |
| K                     | -0.05   | 0.54**   | 0.51**   |
| Mg                    | -0.22   | 0.07     | -0.02    |
| Na                    | 0.01    | -0.55**  | -0.53**  |
| S                     | -0.12   | -0.53**  | -0.54**  |
| Al (bioavailable)     | -0.03   | -0.47*   | -0.46*   |
| As (bioavailable)     | -0.24   | -0.57**  | -0.60*** |
| Cd (bioavailable)     | 0.06    | -0.29    | -0.25    |
| Co (bioavailable)     | -0.10   | -0.45*   | -0.46**  |
| Cr (bioavailable)     | -0.04   | -0.49**  | -0.47**  |
| Cu (bioavailable)     | -0.06   | -0.48**  | -0.47**  |
| Fe (bioavailable)     | -0.11   | -0.38*   | -0.39*   |
| Mn (bioavailable)     | -0.25   | -0.29    | -0.29    |
| Ni (bioavailable)     | 0.18    | -0.16    | -0.10    |
| Pb (bioavailable)     | -0.05   | -0.40*   | -0.38*   |
| Zn (bioavailable)     | 0.04    | -0.63*   | -0.57*   |

**Table S5.** Spearman's rank correlation results for germination parameters in relation to chemical composition of BSFL feedstocks and frass. Plant species tested was radish.

| Parameter             | RSG       | RGG     | GI        |
|-----------------------|-----------|---------|-----------|
| Total carbon          | 0.25      | 0.27    | 0.13      |
| Total nitrogen        | 0.43      | 0.57    | 0.42      |
| C/N ratio             | -0.48     | -0.54   | -0.43     |
| NO3-N                 | -0.93***  | -0.87** | -1.00**** |
| NH4-N                 | -0.22     | -0.06   | -0.3      |
| Total recoverable P   | 0.61      | 0.43    | 0.47      |
| Organic matter        | 0.87**    | 0.87**  | 0.94***   |
| pH                    | 0.78*     | 0.78*   | 0.86**    |
| EC                    | -0.97**** | -0.74*  | -0.93***  |
| Sum of macro elements | -0.80**   | -0.75*  | -0.77*    |
| Ca                    | -0.90***  | -0.83** | -0.92***  |
| K                     | -0.27     | -0.31   | -0.18     |
| Mg                    | 0.82**    | 0.81**  | 0.92***   |
| Na                    | -0.43     | -0.26   | -0.47     |
| S                     | 0.43      | 0.51    | 0.42      |
| Al (bioavailable)     | -0.43     | -0.36   | -0.54     |
| As (bioavailable)     | 0.53      | 0.43    | 0.44      |
| Cd (bioavailable)     | 0.03      | 0.17    | -0.02     |
| Co (bioavailable)     | 0.47      | 0.54    | 0.43      |
| Cr (bioavailable)     | -0.41     | -0.21   | -0.46     |
| Cu (bioavailable)     | 0.48      | 0.52    | 0.42      |
| Fe (bioavailable)     | 0.4       | 0.43    | 0.37      |
| Mn (bioavailable)     | -0.70*    | -0.54   | -0.63     |
| Ni (bioavailable)     | -0.4      | -0.29   | -0.48     |
| Pb (bioavailable)     | -0.24     | -0.04   | -0.28     |
| Zn (bioavailable)     | -0.42     | -0.34   | -0.53     |
